# Supplementary material
Source: publisher site journal article supplement (https://www.dovepress.com/article/385755)
Supplement: Supplementary file 1 [file get_supplementary_file.php]

Table S1 The correlation between sleep parameters and pathological characteristics in Lung adenocarcinoma patients.

| Characteristics | TNM stage | | | p-value | Metastasis | | p-value |
| --- | --- | --- | --- | --- | --- | --- | --- |
| I | II | III-IV |  | NO | YES |  |
| AHI(events/h) | 5.26±6.94 | 5.43±5.36 | 25.42±14.41 | 0.003 | 8.23±9.23 | 25.71±16.14 | 0.007 |
| ODI(events/h) | 8.19±5.48 | 9.40±5.12 | 20.64±10.78 | 0.016 | 10.88±7.24 | 19.98±12.11 | 0.036 |
| CT90 (%) | 1.29±1.73 | 2.67±4.62 | 17.77±27.64 | 0.204 | 9.72±24.99 | 8.89±10.70 | 0.082 |
| LSPO2 | 79.29±6.05 | 81.25±4.92 | 72.6±9.31 | 0.111 | 78.15±7.68 | 73.75±8.99 | 0.246 |

AHI = apnea–hypopnea index; ODI = oxygen desaturation index; CT90 = percentage of time spent with oxygen saturation below 90%; LSPO2 = the lowest pulse oxygen saturation.

Table S2 The correlation of miR-142-3p expression with pathological characteristics.

| Characteristics | TNM stage | | | p-value | Metastasis | | p-value |
| --- | --- | --- | --- | --- | --- | --- | --- |
| I | II | III-IV |  | NO | YES |  |
| MiR-142-3p level | 0.92±0.58 | 0.54±0.36 | 0.25±0.28 | 0.015 | 0.67±0.55 | 0.30±0.29 | 0.096 |

Table S3 The correlation of miR-142-3p expression with sleep parameters.

| Correlations |  |  |  |  |  |  |
| --- | --- | --- | --- | --- | --- | --- |
|  |  | MiR-142-3p level | LSPO2 | CT90 (%) | ODI | AHI |
| MiR-142-3p level | Pearson Correlation | 1 | 0.301 | -0.341 | -.513* | -.505* |
| Sig. (2-tailed) |  | 0.185 | 0.13 | 0.017 | 0.02 |
| N | 21 | 21 | 21 | 21 | 21 |
| LSPO2 | Pearson Correlation | 0.301 | 1 | -0.261 | -.475* | -0.367 |
| Sig. (2-tailed) | 0.185 |  | 0.252 | 0.03 | 0.102 |
| N | 21 | 21 | 21 | 21 | 21 |
| CT90 (%) | Pearson Correlation | -0.341 | -0.261 | 1 | 0.39 | 0.261 |
| Sig. (2-tailed) | 0.13 | 0.252 |  | 0.081 | 0.254 |
| N | 21 | 21 | 21 | 21 | 21 |
| ODI | Pearson Correlation | -.513* | -.475* | 0.39 | 1 | .890** |
| Sig. (2-tailed) | 0.017 | 0.03 | 0.081 |  | 0 |
| N | 21 | 21 | 21 | 21 | 21 |
| AHI | Pearson Correlation | -.505* | -0.367 | 0.261 | .890** | 1 |
| Sig. (2-tailed) | 0.02 | 0.102 | 0.254 | 0 |  |
| N | 21 | 21 | 21 | 21 | 21 |

AHI = apnea–hypopnea index; ODI = oxygen desaturation index; CT90 = percentage of time spent with oxygen saturation below 90%; LSPO2 = the lowest pulse oxygen saturation.
